# Supplementary material
Source: PubMed Central journal article supplement (PMC8809306)
Supplement: KID.0000062020SupplementaryData.pdf [file KID.0000062020SupplementaryData.pdf]

## Supplementary TOC

**Supplementary Table 1.** Inflammatory markers and total QIDS-C<sub>16</sub> scores at baseline and week 12 based on treatment assignment

**Supplementary Table 2.** Inflammatory markers and total QIDS-C<sub>16</sub> scores at baseline and week 12 based on treatment improvement (3-point decrease in QIDS-C<sub>16</sub>)

**Supplementary Table 3.** Inflammatory markers and total QIDS-C<sub>16</sub> scores at baseline and week 12 based on treatment improvement (3-point decrease in QIDS-C<sub>16</sub>) in the sertraline group

**Supplementary Table 4.** Inflammatory markers and total QIDS-C<sub>16</sub> scores at baseline and week 12 on treatment improvement (3-point decrease in QIDS-C<sub>16</sub>) in the placebo group

**Supplementary Table 5.** Inflammatory markers and total QIDS-C<sub>16</sub> scores at baseline and week 12 on treatment improvement (3-point decrease in QIDS-C<sub>16</sub>)

**Supplementary Table 6.** Inflammatory markers and total QIDS-C<sub>16</sub> scores at baseline and week 12 based on treatment response ( $\geq 50\%$  decrease in QIDS-C<sub>16</sub>)

**Supplementary Table 7.** Inflammatory markers and total QIDS-C<sub>16</sub> scores at baseline and week 12 based on treatment response ( $\geq 50\%$  decrease in QIDS-C<sub>16</sub>) in the sertraline group

**Supplementary Table 8.** Inflammatory markers and total QIDS-C<sub>16</sub> scores at baseline and week 12 based on treatment response ( $\geq 50\%$  decrease in QIDS-C<sub>16</sub>) in the placebo group

**Supplementary Table 9.** Inflammatory markers and total QIDS-C<sub>16</sub> scores at baseline and week 12 on treatment response ( $\geq 50\%$  decrease in QIDS-C<sub>16</sub>)

**Supplementary Table 1. Inflammatory markers and total QIDS-C<sub>16</sub> scores at baseline and week 12 based on treatment assignment**

| Variable, median (IQR) | Sertraline<br>N=97   |                      |                        | Placebo<br>N=96      |                      |                        | Between-Groups <i>P</i> Values |            |                        |
|------------------------|----------------------|----------------------|------------------------|----------------------|----------------------|------------------------|--------------------------------|------------|------------------------|
|                        | Baseline             | Study Exit           | Baseline to Study Exit | Baseline             | Study Exit           | Baseline to Study Exit | Baseline                       | Study Exit | Baseline to Study Exit |
| QIDS-C <sub>16</sub>   | 13.0<br>(12.0, 15.0) | 9.0<br>(6.0, 13.0)*  | -4.0 (-7.0, -1.0)      | 14.0<br>(12.0, 16.0) | 10.0<br>(7.0, 12.0)* | -4.0 (-7.0, -2.0)      | 0.76                           | 0.99       | 0.83                   |
| Albumin, g/dL          | 3.8 (3.4, 4.1)       | 3.9<br>(3.5, 4.1)    | 0.0 (-0.3, 0.1)        | 3.9 (3.6, 4.3)       | 3.9 (3.5, 4.2)       | -0.05 (-0.2, 0.2)      | 0.07                           | 0.40       | 0.98                   |
| Pre-albumin, mg/dL     | 31.0<br>(26.0, 35.0) | 29.0<br>(26.0, 35.0) | 0.0 (-5.0, 3.0)        | 29.5<br>(25.0, 35.0) | 30.0<br>(26.0, 38.0) | 0.0 (-3.0, 4.0)        | 0.26                           | 0.67       | 0.20                   |
| IL-6, pg/mL            | 3.9 (2.3, 7.8)       | 3.7<br>(2.3, 5.7)    | 0.3 (-0.9, 1.6)        | 3.8 (2.3, 6.8)       | 4.0 (2.9, 6.1)       | 0.2 (-0.8, 1.3)        | 0.84                           | 0.26       | 0.93                   |
| hsCRP, mg/L            | 3.0 (1.1, 7.6)       | 3.0<br>(1.3, 8.8)    | 0.2 (-0.8, 1.9)        | 3.3 (1.5, 10.0)      | 3.9 (2.0, 7.8)       | 0.3 (-0.8, 2.7)        | 0.28                           | 0.34       | 0.81                   |

\**P*<0.05 study exit value versus baseline value within-group

Abbreviations: hsCRP, high sensitivity C-reactive protein; IL-6, interleukin 6; QIDS-C<sub>16</sub>, 16-item Quick Inventory of Depressive Symptomatology Clinician Rated scale

**Supplementary Table 2. Inflammatory markers and total QIDS-C<sub>16</sub> scores at baseline and week 12 based on treatment improvement (3-point decrease in QIDS-C<sub>16</sub>)**

| Variable, median (IQR) | All Participants Improvers<br>N=115 |                      |                        | All Participants Non-Improvers<br>N=47 |                      |                        | Between-Groups <i>P</i> Values |            |                        |
|------------------------|-------------------------------------|----------------------|------------------------|----------------------------------------|----------------------|------------------------|--------------------------------|------------|------------------------|
|                        | Baseline                            | Study Exit           | Baseline to Study Exit | Baseline                               | Study Exit           | Baseline to Study Exit | Baseline                       | Study Exit | Baseline to Study Exit |
| QIDS-C <sub>16</sub>   | 14.0<br>(12.0, 16.0)                | 7.0<br>(6.0, 10.0)*  | -6.0 (-8.0, -4.0)      | 13.0<br>(12.0, 15.0)                   | 14.0<br>(12.0, 16.0) | 0.0 (-1.0, 2.0)        | 0.10                           | <0.001     | <0.001                 |
| Albumin, g/dL          | 3.9 (3.5, 4.2)                      | 3.9<br>(3.5, 4.1)    | 0.0 (-0.20, 0.10)      | 3.9 (3.5, 4.2)                         | 4.0 (3.6, 4.2)       | -0.1<br>(-0.3, 0.2)    | 0.83                           | 0.37       | 0.87                   |
| Pre-albumin, mg/dL     | 30.0<br>(26.0, 34.0)                | 29.0<br>(26.0, 35.0) | 0.0 (-3.0, 3.0)        | 33.5<br>(27.0, 41.0)                   | 33.0<br>(25.0, 43.0) | 0.0 (-4.5, 4.0)        | 0.01                           | 0.14       | 0.84                   |
| IL-6, pg/mL            | 4.0 (2.5, 6.8)                      | 3.8<br>(2.8, 5.6)    | 0.2 (-0.7, 1.3)        | 3.6 (2.0, 7.5)                         | 4.4 (2.3, 7.1)       | 0.3 (-0.9, 2.1)        | 0.47                           | 0.67       | 0.97                   |
| hsCRP, mg/L            | 4.6 (1.4, 9.1)                      | 3.1<br>(1.8, 6.5)    | 0.1 (-1.1, 1.7)        | 2.4 (1.0, 6.2)                         | 5.4 (1.3, 11.6)*     | 0.5 (-0.3, 6.2)        | 0.04                           | 0.34       | 0.10                   |

\**P*<0.05 study exit value versus baseline value within-group

Abbreviations: hsCRP, high sensitivity C-reactive protein; IL-6, interleukin 6; QIDS-C<sub>16</sub>, 16-item Quick Inventory of Depressive Symptomatology Clinician Rated scale

**Supplementary Table 3. Inflammatory markers and total QIDS-C<sub>16</sub> scores at baseline and week 12 based on treatment improvement (3-point decrease in QIDS-C<sub>16</sub>) in the sertraline group**

| Variable, median (IQR) | Sertraline Improvers<br>N=62 |                      |                        | Sertraline Non-Improvers<br>N=35 |                      |                        | Between-Groups P Values |            |                        |
|------------------------|------------------------------|----------------------|------------------------|----------------------------------|----------------------|------------------------|-------------------------|------------|------------------------|
|                        | Baseline                     | Study Exit           | Baseline to Study Exit | Baseline                         | Study Exit           | Baseline to Study Exit | Baseline                | Study Exit | Baseline to Study Exit |
| QIDS-C <sub>16</sub>   | 14.0<br>(12.0, 16.0)         | 7.0<br>(6.0, 9.0)    | -7.0 (-9.0, -4.0)*     | 13.0<br>(12.0, 15.0)             | 15.0<br>(12.0, 16.0) | 0.0 (-1.0, 3.0)        | 0.04                    | <0.001     | <0.001                 |
| Albumin, g/dL          | 3.8 (3.5, 4.1)               | 3.8 (3.5, 4.1)       | 0.0 (-0.2, 0.1)        | 3.8 (3.3, 4.1)                   | 3.9 (3.4, 4.2)       | -0.2 (-0.3, 0.2)       | 0.40                    | 0.73       | 0.64                   |
| Pre-albumin, mg/dL     | 30.5<br>(26.0, 34.0)         | 29.0<br>(26.0, 34.0) | 0.0 (-5.0, 3.0)        | 34.0<br>(27.0, 42.0)             | 34.0<br>(25.0, 43.0) | 1.0 (-5.0, 3.0)        | 0.048                   | 0.24       | 0.73                   |
| IL-6, pg/mL            | 4.0 (2.5, 8.0)               | 3.7<br>(2.7, 5.6)    | 0.0 (-1.2, 1.5)        | 3.5 (1.8, 7.5)                   | 3.6 (2.3, 7.7)       | 0.5 (-0.8, 2.8)        | 0.22                    | 0.74       | 0.30                   |
| hsCRP, mg/L            | 5.0 (1.7, 8.6)               | 3.0<br>(1.8, 6.7)    | 0.1 (-1.3, 1.8)        | 1.4 (0.6, 3.6)                   | 2.9 (1.0, 10.8)      | 0.4 (-0.3, 2.1)        | 0.005                   | 0.78       | 0.27                   |

\* $P < 0.05$  study exit value versus baseline value within-group

Abbreviations: hsCRP, high sensitivity C-reactive protein; IL-6, interleukin 6; QIDS-C<sub>16</sub>, 16-item Quick Inventory of Depressive Symptomatology Clinician Rated scale

**Supplementary Table 4. Inflammatory markers and total QIDS-C<sub>16</sub> scores at baseline and week 12 on treatment improvement (3-point decrease in QIDS-C<sub>16</sub>) in the placebo group**

| Variable, median (IQR) | Placebo Improvers<br>N=69 |                      |                        | Placebo Non-Improvers<br>N=27 |                      |                        | Between-Groups <i>P</i> Values |            |                        |
|------------------------|---------------------------|----------------------|------------------------|-------------------------------|----------------------|------------------------|--------------------------------|------------|------------------------|
|                        | Baseline                  | Study Exit           | Baseline to Study Exit | Baseline                      | Study Exit           | Baseline to Study Exit | Baseline                       | Study Exit | Baseline to Study Exit |
| QIDS-C <sub>16</sub>   | 14.0<br>(12.0, 16.0)      | 8.0<br>(6.0, 10.0)*  | -6.0 (-8.0, -4.0)      | 14.0<br>(12.0, 15.0)          | 14.0<br>(12.0, 16.0) | 0.0 (-1.0, 1.0)        | 0.86                           | <0.001     | <0.001                 |
| Albumin, g/dL          | 3.9 (3.5, 4.2)            | 3.9 (3.5, 4.1)       | -0.1 (-0.2, 0.2)       | 4.1 (3.7, 4.3)                | 4.0 (3.6, 4.2)       | 0.0 (-0.1, 0.1)        | 0.15                           | 0.30       | 0.42                   |
| Pre-albumin, mg/dL     | 29.0<br>(25.0, 34.0)      | 30.0<br>(26.0, 35.0) | 0.5 (-3.0, 4.0)        | 32.0<br>(27.0, 39.0)          | 31.0<br>(26.5, 40.5) | 0.0 (-0.4, 8.0)        | 0.13                           | 0.37       | 0.99                   |
| IL-6, pg/mL            | 3.9 (2.3, 6.4)            | 3.9 (2.9, 5.4)       | 0.3 (-0.3, 1.2)        | 3.8 (2.5, 8.1)                | 5.4 (2.9, 7.1)       | -0.1 (-1.5, 1.8)       | 0.72                           | 0.36       | 0.34                   |
| hsCRP, mg/L            | 3.9 (1.2, 9.6)            | 3.5 (1.8, 6.5)       | 0.2 (-0.8, 1.6)        | 3.1 (1.7, 12.4)               | 7.6 (2.4, 11.6)      | 1.0 (-0.9, 6.8)        | 0.94                           | 0.06       | 0.25                   |

\**P*<0.05 study exit value versus baseline value within-group

Abbreviations: hsCRP, high sensitivity c-reactive protein; IL-6, interleukin 6; QIDS-C<sub>16</sub>, 16-item Quick Inventory of Depressive Symptomatology Clinician Rated scale

**Supplementary Table 5. Inflammatory markers and total QIDS-C<sub>16</sub> scores at baseline and week 12 on treatment improvement (3-point decrease in QIDS-C<sub>16</sub>)**

| Variable             | Treatment group x improvement status interaction <i>P</i> Values |            |                        |
|----------------------|------------------------------------------------------------------|------------|------------------------|
|                      | Baseline                                                         | Study Exit | Baseline to Study Exit |
| QIDS-C <sub>16</sub> | 0.21                                                             | 0.26       | 0.14                   |
| Albumin, g/dL        | 0.01                                                             | 0.60       | 0.39                   |
| Pre-albumin, mg/dL   | 0.90                                                             | 0.84       | 0.82                   |
| IL-6, pg/mL          | 0.28                                                             | 0.44       | 0.15                   |
| hsCRP, mg/L          | 0.04                                                             | 0.19       | 0.86                   |

Abbreviations: hsCRP, high sensitivity C-reactive protein; IL-6, interleukin 6; QIDS-C<sub>16</sub>, 16-item Quick Inventory of Depressive Symptomatology Clinician Rated scale

**Supplementary Table 6. Inflammatory markers and total QIDS-C<sub>16</sub> scores at baseline and week 12 based on treatment response ( $\geq 50\%$  decrease in QIDS-C<sub>16</sub>)**

| Variable, median (IQR) | All Participants Responders<br>N=55 |                      |                        | All Participants Non-Responders<br>N=138 |                      |                        | Between-Groups P Values |            |                        |
|------------------------|-------------------------------------|----------------------|------------------------|------------------------------------------|----------------------|------------------------|-------------------------|------------|------------------------|
|                        | Baseline                            | Study Exit           | Baseline to Study Exit | Baseline                                 | Study Exit           | Baseline to Study Exit | Baseline                | Study Exit | Baseline to Study Exit |
| QIDS-C <sub>16</sub>   | 14.0<br>(12.0, 16.0)                | 5.0<br>(4.0, 6.0)*   | -8.0 (-10.0, -7.0)     | 13.5<br>(12.0, 16.0)                     | 11.0<br>(9.0, 14.0)* | -3.0 (-5.0, 0.0)       | 0.88                    | <0.001     | <0.001                 |
| Albumin, g/dL          | 3.8 (3.5, 4.2)                      | 3.9<br>(3.5, 4.1)    | 0.0 (-0.2, 0.2)        | 3.0 (3.5, 4.2)                           | 3.9 (3.5, 4.2)       | 0.0 (-0.2, 0.1)        | 0.49                    | 0.67       | 0.51                   |
| Pre-albumin, mg/dL     | 30.0<br>(25.0, 34.0)                | 30.0<br>(27.0, 35.0) | 0.0 (-2.0, 3.0)        | 31.0<br>(27.0, 35.0)                     | 29.0<br>(26.0, 37.0) | 0.0 (-4.0, 3.0)        | 0.21                    | 0.56       | 0.67                   |
| IL-6, pg/mL            | 3.9 (2.3, 6.8)                      | 3.6<br>(2.6, 4.7)    | 0.1 (-1.0, 1.1)        | 3.8 (2.3, 7.1)                           | 4.0 (2.8, 6.4)       | 0.3 (-0.8, 1.8)        | 0.95                    | 0.21       | 0.42                   |
| hsCRP, mg/L            | 4.4 (1.9, 13.8)                     | 3.3<br>(2.0, 4.7)    | -0.02<br>(-2.1, 1.0)   | 3.1 (1.1, 7.5)                           | 3.7 (1.7, 8.8)*      | 0.4 (-0.5, 3.3)        | 0.18                    | 0.44       | 0.03                   |

\* $P < 0.05$  study exit value versus baseline value within-group

Abbreviations: hsCRP, high sensitivity c-reactive protein; IL-6, interleukin 6; QIDS-C<sub>16</sub>, 16-item Quick Inventory of Depressive Symptomatology Clinician Rated scale

**Supplementary Table 7. Inflammatory markers and total QIDS-C<sub>16</sub> scores at baseline and week 12 based on treatment response ( $\geq 50\%$  decrease in QIDS-C<sub>16</sub>) in the sertraline group**

| Variable, median (IQR) | Sertraline Responders<br>N=31 |                      |                        | Sertraline Non-Responders<br>N=66 |                      |                        | Between-Groups <i>P</i> Values |            |                        |
|------------------------|-------------------------------|----------------------|------------------------|-----------------------------------|----------------------|------------------------|--------------------------------|------------|------------------------|
|                        | Baseline                      | Study Exit           | Baseline to Study Exit | Baseline                          | Study Exit           | Baseline to Study Exit | Baseline                       | Study Exit | Baseline to Study Exit |
| QIDS-C <sub>16</sub>   | 15.0<br>(12.0, 17.0)          | 6.0<br>(4.0, 6.0)*   | -9.0 (-11.0, -7.0)     | 13.0<br>(12.0, 15.0)              | 12.0<br>(9.0, 15.0)* | -2.0 (-4.0, 0.0)       | 0.08                           | <0.001     | <0.001                 |
| Albumin, g/dL          | 3.8 (3.5, 4.1)                | 3.9<br>(3.5, 4.1)    | 0.0 (-0.2, 0.4)        | 3.8 (3.4, 4.1)                    | 3.9 (3.5, 4.1)       | -0.1 (-0.3, 0.1)       | 0.94                           | 0.85       | 0.52                   |
| Pre-albumin, mg/dL     | 31.0<br>(26.0, 34.0)          | 30.0<br>(27.0, 33.0) | -1.0 (-2.0, 3.0)       | 32.0<br>(27.0, 38.0)              | 29.0<br>(25.0, 37.0) | 0.0 (-5.0, 3.0)        | 0.26                           | 0.93       | 0.91                   |
| IL-6, pg/mL            | 3.9 (2.5, 7.0)                | 3.6<br>(2.5, 4.4)    | 0.2 (-0.7, 1.1)        | 3.7 (2.1, 8.0)                    | 4.0 (2.3, 6.5)       | 0.3 (-0.9, 3.5)        | 0.47                           | 0.44       | 0.45                   |
| hsCRP, mg/L            | 5.0 (2.0, 14.6)               | 3.2<br>(2.0, 5.2)    | 0.3 (-1.7, 1.8)        | 2.7 (0.8, 6.0)                    | 2.8 (1.2, 9.2)       | 0.2 (-0.5, 2.1)        | 0.03                           | 0.62       | 0.72                   |

\* $P < 0.05$  study exit value versus baseline value within-group

Abbreviations: hsCRP, high sensitivity c-reactive protein; IL-6, interleukin 6; QIDS-C<sub>16</sub>, 16-item Quick Inventory of Depressive Symptomatology Clinician Rated scale

**Supplementary Table 8. Inflammatory markers and total QIDS-C<sub>16</sub> scores at baseline and week 12 based on treatment response ( $\geq 50\%$  decrease in QIDS-C<sub>16</sub>) in the placebo group**

| Variable, median (IQR) | Placebo responders<br>N=24 |                      |                        | Placebo non-responders<br>N=72 |                      |                        | Between-Groups <i>P</i> Values |            |                        |
|------------------------|----------------------------|----------------------|------------------------|--------------------------------|----------------------|------------------------|--------------------------------|------------|------------------------|
|                        | Baseline                   | Study Exit           | Baseline to Study Exit | Baseline                       | Study Exit           | Baseline to Study Exit | Baseline                       | Study Exit | Baseline to Study Exit |
| QIDS-C <sub>16</sub>   | 13.0<br>(11.5, 15.0)       | 5.0<br>(4.5, 6.0)*   | -8.0 (-9.0, -7.0)      | 14.0<br>(12.0, 16.0)           | 11.0<br>(9.0, 13.5)* | -3.0 (-5.0, -1.0)      | 0.10                           | <0.001     | <0.001                 |
| Albumin, g/dL          | 3.8 (3.5, 4.2)             | 4.0<br>(3.5, 4.2)    | -0.1 (-0.2, 0.2)       | 4.0 (3.6, 4.3)                 | 3.9 (3.6, 4.2)       | 0.0 (-0.2, 0.1)        | 0.34                           | 0.81       | 0.82                   |
| Pre-albumin, mg/dL     | 27.0<br>(24.0, 34.5)       | 34.5<br>(25.0, 38.5) | 1.0 (-2.5, 5.0)        | 30.0<br>(27.0, 35.0)           | 30.0<br>(26.0, 35.0) | 0.0 (-3.0, 3.0)        | 0.41                           | 0.44       | 0.50                   |
| IL-6, pg/mL            | 3.0 (2.2, 6.8)             | 3.6<br>(2.6, 5.2)    | 0.1 (-1.5, 1.4)        | 4.1 (2.5, 6.7)                 | 4.1 (2.9, 6.2)       | 0.3 (-0.4, 1.2)        | 0.45                           | 0.51       | 0.70                   |
| hsCRP, mg/L            | 3.2 (1.3, 9.1)             | 3.4<br>(2.0, 4.5)    | -0.4 (-9.3, 0.2)       | 3.7 (1.7, 10.0)                | 4.9 (1.8, 8.8)*      | 0.8 (-0.1, 3.9)        | 0.80                           | 0.13       | 0.008                  |

\* $P < 0.05$  study exit value versus baseline value within-group

Abbreviations: hsCRP, high sensitivity c-reactive protein; IL-6, interleukin 6; QIDS-C<sub>16</sub>, 16-item Quick Inventory of Depressive Symptomatology Clinician Rated scale

**Supplementary Table 9. Inflammatory markers and total QIDS-C<sub>16</sub> scores at baseline and week 12 on treatment response ( $\geq 50\%$  decrease in QIDS-C<sub>16</sub>)**

| Variable             | Treatment group x response status interaction <i>P</i> Values |            |                        |
|----------------------|---------------------------------------------------------------|------------|------------------------|
|                      | Baseline                                                      | Study Exit | Baseline to Study Exit |
| QIDS-C <sub>16</sub> | 0.02                                                          | 0.62       | 0.04                   |
| Albumin, g/dL        | 0.48                                                          | 0.95       | 0.70                   |
| Pre-albumin, mg/dL   | 0.84                                                          | 0.57       | 0.73                   |
| IL-6, pg/mL          | 0.30                                                          | 0.94       | 0.82                   |
| hsCRP, mg/L          | 0.09                                                          | 0.22       | 0.08                   |

Abbreviations: hsCRP, high sensitivity C-reactive protein; IL-6, interleukin 6; QIDS-C<sub>16</sub>, 16-item Quick Inventory of Depressive Symptomatology Clinician Rated scale
